# Supplementary material for: The Effect of Anesthesia and Surgery on Postoperative Changes in Plasma biomarkers of neuronal injury, Alzheimer's disease, and inflammation in healthy subjects
Source: Research Square preprint supplement (doi:10.21203/rs.3.rs-317062/v1), 2021-03-23
Supplement: Supplementary file 1 [file c4b111c76b282db60aaf0345.docx]

Inclusion and Exclusion criteria

Inclusion criteria

(1) Age 18-35 years old (inclusive).

(2) Body Mass Index (BMI) within the range 18.0-25.0 kg/m² (inclusive).

(3) Be in healthy condition, no history of heart, liver, kidney, digestive tract, nervous system, mental diseases and metabolic diseases.

(4) Medical history, physical examination, 12-lead electrocardiogram and laboratory test show subjects to be healthy.

(5) No history of operation and general anesthesia.

Exclusion criteria

(1) There were abnormalities in physical examination items, blood routine, liver, kidney function tests, hepatitis B/C, HIV (clinical significance).

(2) Consume tobacco in any form or other nicotine-containing products 2 months; drug or alcohol abuse.

(3) be on any regular medications, including over the counter medications 5 week before

(4) have donated, lost or received blood within 6 months prior to the clinical study.

(5) had a family history of AD.
